# Supplementary material for: The Use of Music in the Treatment and Management of Serious Mental Illness: A Global Scoping Review of the Literature
Source: PubMed Central journal article supplement (PMC8044514; doi:10.3389/fpsyg.2021.649840), 2021-03-31
Supplement: Data_Sheet_2.pdf [file Data_Sheet_2.pdf]

## Data Sheet 2: List of Measures

| Standardized Questionnaires (n = 201)                |                                                                |
|------------------------------------------------------|----------------------------------------------------------------|
| Stroop Test                                          | Rey Auditory Verbal Learning Test (RAVLT)                      |
| Faux Pas Test                                        | Verbal Fluency Test                                            |
| Benton visual retention test (BVRT)                  | Somatoform Dissociation Questionnaire                          |
| Beck Anxiety Inventory (BAI)                         | Disability Status Scale (DSS-20)                               |
| Hamilton Anxiety Rating Scale (HAMA-A, HARS)         | Category Fluency Test                                          |
| Hamilton Depression Rating Scale (HRSD, HAM-D)       | CVS (Comprehension, Vocabulary, Similarities)                  |
| State-Trait Anxiety Inventory (STAI)                 | Quality of Life Systematic Inventory (QLSI)                    |
| Perceived Stress Scale (PSS)                         | Quality of Life Scale (QLS)                                    |
| Montgomery– Asberg Depression Rating Scale (MADRS)   | State-Trait Anxiety Inventory for Children (STAI-C)            |
| Zung Depression Scale                                | State-Trait Anger Expression Inventory-2 (STAXI)               |
| Brief Psychiatric Rating Scale (BPRS)                | Mini International Neuropsychological Interview (MINI)         |
| Hospital Anxiety and Depression Scale (HADS)         | Valutazione delle Abilità e Definizione degli Obiettivi (VADO) |
| Clinical Global Impression (CGI)                     | Nurse's Observation Scale for Inpatient Evaluation (NOSIE)     |
| Global Assessment of Functioning (GAF)               | Client Satisfaction Questionnaire                              |
| Semantic Differential Scale                          | PTSD Checklist Civilian (PCL-C)                                |
| WHO Disability Assessment Schedule 2.0 (WHODAS 2.0)  | PTSD Stress Disorder Check List (PCL)                          |
| WHO Quality of Life Scale (WHOQOLBREF)               | Posttraumatic Stress Diagnostic Scale (PDS)                    |
| WHO-5 Well-Being Index-5                             | Primary Care-PTSD screen (PC-PTSD-5)                           |
| Quality of Life Enjoyment and Satisfaction (Q-LES-Q) | PTSD-8                                                         |
| Quality of life survey RAND–36                       | Rosenberg Self Esteem Scale                                    |
| Profile of Mood States (POMS)                        | UCLA Loneliness Scale                                          |
| Positive and Negative Syndrome Scale (PANSS)         | Index of Spouse Abuse (ISA)                                    |
| Positive and Negative Affect Schedule (PANAS)        | Social Avoidance and Distress Scale (SADS)                     |
| PTSD Checklist for DSM-5 (PCL 5)                     | Hopkins Symptom Check List                                     |
| PTSD Symptom Scale Interview (PSS-I)                 | Quick Inventory of Depressive Symptomatology (QIDS)            |
| Center for Epidemiologic Studies Depression Scale    | Cornell Scale for Depression in Dementia (C-CSD)               |
| Beck Depression Inventory (BDI)                      | Edinburgh Postnatal Depression Scale (EPDS)                    |
| EuroQoL (EQ-5D-5L)                                   | Revised Prenatal Distress Questionnaire (NuPDQ)                |

|                                                                                        |                                                                 |
|----------------------------------------------------------------------------------------|-----------------------------------------------------------------|
| Brief Symptom Inventory (BSI)                                                          | Child Behavior Checklist (CBCL)                                 |
| Wechsler Memory Scale (WMS)                                                            | The Cognitive Failures Questionnaire (CFQ)                      |
| Symbol Digit Modalities Test (SDMT)                                                    | Brief Negative Symptom Scale (BNSS)                             |
| Children's Depression Inventory (CDI)                                                  | Calgary Depression Scale for Schizophrenia (CDSS)               |
| Rumination Reflection Questionnaire (RRQ)                                              | Spirituality Index of Wellbeing (SIWB)                          |
| Scale for the Assessment of Negative Symptoms (SANS)                                   | UKU (Side effects Rating) scale                                 |
| Pittsburgh Sleep Quality Index (PSQI)                                                  | Life Skills Profile (LSP)                                       |
| Neuropsychiatric Inventory (NPI)                                                       | Personal Questionnaire Rapid Scaling Technique (PQRST)          |
| Inventory for the Assessment of Activation and Arousal modulation through Music (IAAM) | Toronto Alexithymia Scale (TAS-20)                              |
| Self-Concept Inventory (SKI, "Selbstkonzeptinventar")                                  | Multi-Dimensional Scale for Rating Psychiatric Patients (MSRPP) |
| Scale for the Assessment of Positive Symptoms (SAPS)                                   | Thematic Apperception Test (TAT)                                |
| Characteristics of Auditory Hallucinations Questionnaire                               | Patient Health Questionnaire (PHQ-9) (PHQ-8)                    |
| Mini Sleep Questionnaire (MSQ)                                                         | Generalized Anxiety Disorder seven-item (GAD-7)                 |
| Technion Sleep Questionnaire                                                           | Oxford Happiness Questionnaire (OHQ)                            |
| Fast Assessment of Children's Emotions (FACE)                                          | Mini-Mental State Examination (MMSE)                            |
| Depression Adjective Checklist (DACL)                                                  | Brief Assessment of Cognition in Schizophrenia (BACS)           |
| UCLA PTSD RI                                                                           | Inventory of Interpersonal Problems (IIP)                       |
| Child's Reaction to Traumatic Events Scale (CRTES)                                     | Mindful Attention Awareness Scale (MAAS)                        |
| Screen for Child Anxiety Related Disorders (SCARED)                                    | Sense of Coherence scale (SOC)                                  |
| Speilberger State Anxiety Inventory                                                    | Harvard Trauma Questionnaire (HTQ)                              |
| Social Fear Scale                                                                      | Geriatric Anxiety Scale (GAS)                                   |
| Sociability Scale                                                                      | Geriatric Depression Scale (GDS)                                |
| Core Self-Evaluation Scale (CSES)                                                      | Beck Hopelessness Scale (BHS)                                   |
| State Hope Scale (SHS)                                                                 | "How Do You Feel?" questionnaire (HDYF)                         |
| Multidimensional Scale of Perceived Social Support (MSPSS)                             | Wake Forest Physician Trust Scale                               |
| Phenomenology of Consciousness Inventory (PCI)                                         | Musical Interaction Rating Scale (MIR(S))                       |
| Visual Analog Scale (VAS)                                                              | Music Improvisation Rating (MIR)                                |
| Clinical Outcomes in Routine Evaluation (CORE)                                         | McReynolds Ferguson Hospital Adjustment Scale (HAS)             |

|                                                                                 |                                                                                        |
|---------------------------------------------------------------------------------|----------------------------------------------------------------------------------------|
| Body Image Assessment (BIA)                                                     | Heidelberg State Inventory                                                             |
| Ten-Item Personality Inventory (TIPI)                                           | Perception of Boundaries Scale (GO)                                                    |
| Satisfaction with Life Scale (SWLS)                                             | Embodied Intersubjectivity Scale (EIS)                                                 |
| Body Self-Efficacy (BSE)                                                        | Giessen Complaint List for Children and Adolescents (GCL-CA)                           |
| Depression, Anxiety and Stress Scale (DASS-21)                                  | Inventory of Life Quality in Children and Adolescents (ILC)                            |
| Heidelberger Befindlichkeitsskala (HBS)                                         | Mental Health Continuum-Short Form (MHC-SF)                                            |
| Therapeutic Reactance Scale                                                     | Negative Symptom Rating Scale                                                          |
| Social Interaction Anxiety Scale (SIAS)                                         | Interest in Music Scale (IIM)                                                          |
| Interaction Anxiousness Scale (IAS)                                             | Multidimensional Mood State Questionnaire                                              |
| Audience Anxiousness Scale (AAS)                                                | Warwick-Edinburgh Mental Well-Being Scale                                              |
| Richards-Campbell Sleep Questionnaire (RCSQ)                                    | Professional Care Team Burden Scale (PCBT)                                             |
| Emotion Regulation of Others and Self (EROS)                                    | Richmond Agitation and Sedation Scale (RAAS)                                           |
| Persons related to others questionnaire-2 (PROQ-2)                              | Physical Activity Enjoyment Scale (PACES)                                              |
| Multi-scale dissociation inventory (MDI)                                        | Connor-Davidson Resilience Scale (CDR)                                                 |
| Altered States of Consciousness Scale (11D-ASC)                                 | Texas Social Behaviour Inventory                                                       |
| Relationship Change Scale (RCS)                                                 | Revised Children's Manifest Anxiety Scale (RCMAS)                                      |
| Subjective Well-Being in Patients with Schizophrenia under Neuroleptics (SWN-K) | Children's Dissociative Experiences Scale and Post Traumatic Symptom Inventory (C-Des) |
| Quality of Life Enjoyment and Satisfaction Questionnaire (Q-LES-Q)              | Child and Adolescent Functional Assessment Scale (CAFAS)                               |
| Kiddie Schedule for Affective Disorders and Schizophrenia (KIDDIESADS)          | Adolescent Psychopathology Scale (APS)                                                 |
| Schedule for Affective Disorders and Schizophrenia (SADS)                       | Reynolds Adolescent Depression Scale, 2nd edition (RADS 2)                             |
| University of Rhode Island Change Assessment (URICA)                            | Adolescent Visual-Analog Recreational Music Making Assessment (A-VARMMMA)              |
| Thai Depression Inventory (TDI)                                                 | Dissociative Experiences Scale (DES)                                                   |
| Adolescent Anger Rating Scale (AARS)                                            | Dissociative Experiences Scale Taxon (DES-T)                                           |
| Positive State of Mind Scale (PSOMS)                                            | Treatment Acceptability and Preference (TAP) questionnaire                             |
| Camarillo Dynamic Assessment Scales                                             | Social Phobia Inventory for Children (SPAI-C)                                          |
| Home and Community Social Behavior Scale (HCSBS)                                | Impact of Event Revised (IES-R)                                                        |
| <i>Ekman test</i>                                                               | Paced Auditory Serial Addition Test (PASAT)                                            |
| Kessler 10 depression (distress) scale                                          | Chart of interpersonal reactions in closed living environments (CIRCLE)                |
| Clinical Dementia Rating (CDR)                                                  | Depression Mood Self-Report Inventory for Adolescence                                  |

|                                                                                           |                                                                                      |
|-------------------------------------------------------------------------------------------|--------------------------------------------------------------------------------------|
| Quality of Life in Alzheimer's Disease (QOL-AD)                                           | Lucas and Ludwick mood scale                                                         |
| Quality of Life Inventory (QOLI)                                                          | Anxiety Sensitivity Index-3 (ASI-3)                                                  |
| Group Climate Questionnaire (GCQ-S)                                                       | Subjective Units of Distress Scale (SUD)                                             |
| Life Events Checklist (LEC-5)                                                             | Short Mood and Feelings Questionnaire (SMFQ)                                         |
| ENRICH Social Support Instrument (ESSI)                                                   | Strengths and Difficulties Questionnaire (SDQ)                                       |
| Social Skills Improvement System (SSIS)                                                   | Pediatric Quality of Life Inventory 4.0 Generic Core Scale (PedsQL 4.0)              |
| Behavioral and Symptom Identification Scale (BASIS-32)                                    | Gießentest self-assessment (GTS)                                                     |
| Trauma Related Guild Inventory (TRGI)                                                     | Gießentest observer assessment (GTFm)                                                |
| Scale of Body Connection (SBC)                                                            | Scales for mental health (SPG)                                                       |
| Difficulties in Emotion Regulation Scale (DERS)                                           | Social Skills Assessment                                                             |
| Body Investment Scale                                                                     | Snaith-Hamilton Pleasure Scale (SHAPS)                                               |
| Ann Arbor Mental Status Scale                                                             | Barcelona Music Reward Questionnaire (BMRQ)                                          |
| Jenkins Symptom Rating Sheet                                                              | Impact Message Inventory (IMI-R)                                                     |
| Lorr scale (general functioning)                                                          | Relationship Questionnaire (RQ)                                                      |
| Albany Behavioural Rating Scale                                                           | Fatigue Scale                                                                        |
| Functional assessment of chronic illness therapy-spiritual well-being scale (FACIT-Sp-12) |                                                                                      |
| <b>Qualitative Methods (n = 35)</b>                                                       |                                                                                      |
| Qualitative description/analysis                                                          | Interpretative phenomenological analysis                                             |
| Qualitative Assessment                                                                    | Autoethnography                                                                      |
| Qualitative Interview                                                                     | Think-Aloud measure                                                                  |
| Interview                                                                                 | Children's actions and thoughts                                                      |
| Semi-structured Interview                                                                 | A six-dimensional framework                                                          |
| Anecdotal testimony                                                                       | Description of music therapy                                                         |
| Focus Group                                                                               | Compared drawings based on color, line and movement                                  |
| Case Study                                                                                | Description of patient's progress through vignettes of different phases of treatment |
| Observation                                                                               | Comparison of narratives made with and without music                                 |
| Psychiatrist analysis                                                                     | Human Figure Drawing Test (HFDT)/Draw-A-Person (DAP) Test                            |
| Self-Report                                                                               | Test for Creative Thinking - Drawing Production (TCT-DP)                             |
| Session record forms/post-therapy individual patient reports                              | Rorschach assessment                                                                 |
| First-person recounting                                                                   | Musical Experience Interview'                                                        |

|                                                            |                                                                               |
|------------------------------------------------------------|-------------------------------------------------------------------------------|
| Thematic Analysis/Responses                                | Drop out from therapy (rate)                                                  |
| Facial, gestural, vocal or (para-)verbal expressions       | Total and component costs of the interventions                                |
| Questionnaire not specified                                | Personal Activities of Daily Living (PADL)                                    |
| Measure not specified                                      | Songwriting Assessment for Hopelessness                                       |
| Face scale (mood)                                          |                                                                               |
| <b>Custom Questionnaires (n = 13)</b>                      |                                                                               |
| Likert Scale created                                       | Patient Self Ratings with adjective list based on Semantic Differential Scale |
| Researchers developed own scales                           | Volwiler Body Movement Analysis (VBMA)                                        |
| Total complaint verbalizations                             | Custom word associations (WA) questionnaire                                   |
| Idiosyncratic Measure of Convictions in Thoughts           | Custom assessment of the patient reaction questionnaire                       |
| Rhythmic Attunement Scale – Psychosis (RASP)               | Index of Musical Experience (IME)                                             |
| Modified Version of Interpersonal Behavior Inventory (IBI) | Elderly Information Form                                                      |
| Interpersonal Reaction Test (IPRT)                         |                                                                               |
| <b>Biomarkers (n = 11)</b>                                 |                                                                               |
| Electromyography (EMG)                                     | Finger Temperature                                                            |
| Cervical-trapezius electromyography (CT)                   | Pulse Rate/Heart Rate                                                         |
| Skin Conductance                                           | Immediate Mood State                                                          |
| Skin temperature (ST)                                      | fMRI                                                                          |
| Electroencephalogram (EEG)                                 | Brain activation of medial prefrontal cortex                                  |
| Biomarkers                                                 |                                                                               |
| <b>Physical Performance Tests (n = 11)</b>                 |                                                                               |
| Evaluations of sleep                                       | MACC (motility)                                                               |
| Physical Agility                                           | Eyes Test                                                                     |
| One Leg Stance test (OLS)                                  | Continuous Performance Test-Identical Pairs (CPT-IP)                          |
| Timed Up and Go test (TUG)                                 | Beery Visual–Motor Integration Test (VMI)                                     |
| Ambulatory monitoring                                      | Chu's Attention Test                                                          |
| Trail Making Test                                          |                                                                               |
