# Supplementary material for: The Use of Music in the Treatment and Management of Serious Mental Illness: A Global Scoping Review of the Literature
Source: PubMed Central journal article supplement (PMC8044514; doi:10.3389/fpsyg.2021.649840), 2021-03-31
Supplement: Data_Sheet_3.pdf [file Data_Sheet_3.pdf]

### Data Sheet 3: General Reporting Recommendations

| Information                                  | Sample Details/Questions                                                                                                                                                                                                                                                                                               |
|----------------------------------------------|------------------------------------------------------------------------------------------------------------------------------------------------------------------------------------------------------------------------------------------------------------------------------------------------------------------------|
| <b>Use Standardized Reporting Guidelines</b> | Use appropriate, existing reporting guidelines for study design (e.g., CONSORT for RCTs, STROBE for observational studies, CARE for case reports, etc.) See the Equator Network for details: <a href="https://www.equator-network.org/reporting-guidelines/">https://www.equator-network.org/reporting-guidelines/</a> |
|                                              | Identify and utilize existing reporting guidelines for the conditions/populations of interest (e.g., Kaloupek et al., 2010)                                                                                                                                                                                            |
|                                              | Identify and utilize the reporting guidelines for the types of data collected as part of the study (e.g., eMOOD (Faurholt-Jepsen et al., 2019), fMRI (Poldrack et al., 2008))                                                                                                                                          |
| <b>Population Under Study</b>                | Demographics: race/ethnicity; gender; age; condition/diagnosis (if applicable); geographic region; group (if applicable; e.g., veteran, high school football team, new mothers, etc.). May also include education, socioeconomic status, language.                                                                     |
|                                              | How were participants selected for inclusion in the program or study? (If diagnosis was an inclusion criterion, was diagnosis confirmed? If so, how?)                                                                                                                                                                  |
|                                              | How long have participants lived with the condition under study?                                                                                                                                                                                                                                                       |
|                                              | Have participants experienced any previous failed therapies?                                                                                                                                                                                                                                                           |
| <b>Development of Project</b>                | Is this project/program based on an existing theory or disciplinary framework? (If so, describe/cite.)                                                                                                                                                                                                                 |
|                                              | Had this music-inclusive intervention been previously developed? If so, by whom?                                                                                                                                                                                                                                       |
|                                              | Had this music-inclusive intervention been previously evaluated? If so, by whom? What were the results?                                                                                                                                                                                                                |
|                                              | Alternatively, was this a bespoke music engagement designed specifically for a study / research endeavor? If so, who designed it? based on what research/literature?                                                                                                                                                   |
| <b>Facilitator Information</b>               | Who facilitated the music-based aspects of this program/intervention? What were their credentials related to this involvement?                                                                                                                                                                                         |
|                                              | What were the facilitator's precise roles? (How were they engaged with the participants and/or the program process--at each stage of the intervention?) Note that a facilitator's role or particular engagement often changes throughout a program/study; all stages and roles should be reported)                     |
| <b>Setting</b>                               | What was the setting for the program/intervention? High levels of description are valuable for determining potential effects of environment on outcomes.                                                                                                                                                               |
|                                              | Location (clinic, community center, school, faith setting, outdoors, etc.); description (size of room, layout, spaciousness, windows, current/dated decor, etc.); privacy level; etc.                                                                                                                                  |
| <b>Dose and Duration</b>                     | How much time during each session was the participant engaged in the music-based activity?                                                                                                                                                                                                                             |
|                                              | How many sessions were held? How often? Over how many days/weeks/months/years?                                                                                                                                                                                                                                         |
| <b>Participant Choice, Autonomy</b>          | Did the program/study involve music as one among many activities "on the menu"? (For example, did patients select a music activity from a variety of options (e.g., yoga, meditation, horseback riding, etc.)? If so, note any other options available, and what factors may have played into participants' choices.   |
|                                              | Did participants choose how long during each session to engage in the activity?                                                                                                                                                                                                                                        |
|                                              | Did participants choose how many sessions to attend?                                                                                                                                                                                                                                                                   |
